# Supplementary material for: Fairness analysis of machine learning predictions of aggression in acute psychiatric care
Source: Research Square preprint supplement (doi:10.21203/rs.3.rs-7781555/v1), 2025-10-31
Supplement: Supplementary file 1 [file 8837081760948c82b2b46d3d.docx]

**Supplementary methods**

**Data processing**

Supplementary table 1. Variables derived from the EHR and processing description

| **Variable** | **Measured in EHR** | **Description of Processing** |
| --- | --- | --- |
| Age | Numerical, continuous variable | Grouped into categories 16-24; 25-29; 30-34; 35-44; 45-64; 65+ |
| Gender | Categorical variable, with the following categories: Male, Female, Trans male to female, Trans female to male, Non-binary, Other,* Prefer not to answer, Do not know | Grouped into three categories: Male, Female, and Gender Expansive (which included any responses that did not fall under the previous two categories) |
| Race/Ethnicity | Categorical variable, with the following categories: Asian-East (i.e. China, Japan, Korea), Asian-South (i.e. India, Pakistan, Sri Lanka), Asian-South East (i.e. Malaysia, Filipino, Vietnamese), Black-African (i.e. Ghanaian, Kenyan, Somali), Black-Caribbean (i.e. Barbadian, Jamaican), Black-North American (i.e. Canadian, American), First Nations, Indian-Caribbean (i.e. Guyanese with origins in India), Indigenous/Aboriginal not included elsewhere, Inuit, Latin American (i.e. Argentinean, Chilean, Salvadorian), Metis, Middle Eastern (i.e. Egyptian, Iranian, Lebanese), Mixed Heritage (i.e. Black-African and White-North American), White North American (i.e. Canadian, American), White-European (i.e. English, Italian, Portuguese, Russian), Other,* Prefer not to answer, Do not know | Grouped into Black (African, Caribbean, Black, North-American), Asian (Asian-East, Asian-South, Asian-South East), South Asian (South-Asian, Indian Caribbean), Indigenous (First Nations, Inuit, Metis, Indigenous/Aboriginal not included elsewhere), Latin-American, Middle-Eastern, Mixed, White (White-European, White-North-American) |
| Housing Status | Categorical variable, with the following categories: Apartment, Boarding home, Correctional facility, Homeless/On the street, Group home, Living with parents, Own home, Renting home, Shelter/Hostel, Supportive housing, Other,* Prefer not to answer, Do not know | Grouped into own (Own home), renting (Renting Home/Boarding Home/Co-op housing), Supportive (Supportive Housing/Correctional facility/Group home/Nursing home), Living with family (Living with parents, etc.), unstable housing or unhoused (Living with friends/Airbnb/Hostel/Couch surfing/Shelter/Hostel/Homeless/on the street) |
| Admission mode | Categorical variable, with the following categories: By self, Family/Friend, Case worker or Nurse, Police, Mobile Crisis Unit, Other | Categories were kept as is, except Police and Mobile Crisis Unit were grouped together |
| Assessment Location | Categorical variable, indicating on which acute care unit the assessment took place, with the following options: PRT5, PRT6, PRT7, PRT8, GAUA, GAUB, CCC3, CCC4, CCC5, CCC6, CCC7, MWU, CRTU, YTHU, ED, EDH, EAU, FGUA, FGUB, FGUC, FGUD, FWSU, LAU, SOTU | Grouped into Psychosis recovery & Tx (PRT5, PRT6, PRT7, PRT8), Geriatric Admission Unit (GAUA, GAUB), Complex Care Unit (CCC3, CCC4, CCC5, CCC6, CCC7), Addictions (MWU, CRTU, YTHU), Emergency (ED, EDH, EAU), Forensics (FGUA, FGUB, FGUC, FGUD, FWSU, LAU, SOTU) |

**Note.* If patients select ‘Other’, they are asked to describe their response using free-text; any available responses were reviewed by the study team and coded into the final categories used for analysis.

**Coding primary diagnosis**
In the EHR, this variable appeared as a descriptive field containing 1528 unique pre-determined responses (e.g., Schizophrenia, BPD, MDD, AUD… etc.), which in some cases, contained additional descriptors or qualifiers, related to severity or nature of episode.

First, the descriptors were pre-processed by removing the additional descriptors or qualifiers, and setting to lowercase. However, any qualifiers indicating the illness as being in remission was categorized as ‘Remission’. Next, we used regular expressions to code any texts into the following DSM-5 Diagnosis categories, based on their included terms (provided below).

*DSM 5 Diagnoses categories*

Schizophrenia spectrum disorder

o Schizophrenia

o Schizophreniform disorder

o Schizoaffective disorder

o Delusional disorder

o Brief psychotic disorder

o Substance/medication-induced psychotic disorder

o Psychotic disorder due to another medical condition

o Catatonia

o Any response containing "induced psychotic"

Bipolar mood disorder

o Bipolar I disorder

o Bipolar II disorder

o Cyclothymic disorder

o Bipolar disorder due to another medical condition

o Substance/medication induced bipolar disorder

Depressive disorder

o Major depressive disorder

o Persistent depressive disorder or dysthymia

o Premenstrual dysphoric disorder

o Substance/medication-induced depressive disorder

o Depressive disorder due to another medical condition

o Other specified depressive disorder (includes 1.Recurrent depressive episode and 2. Short-duration depressive episode)

o Unspecified depressive disorder (includes 1.Melancholia 2. Atypical depression 3. Peripartum depression 4. Seasonal pattern (also known as Seasonal affective disorder [sad])

o Disruptive mood dysregulation disorder

o Any response containing "depressive" (unless there is a reference to bipolar disorder, eg. "recurrent major depressive episodes with bipolar disorder"

Substance-related disorder

o Alcohol use disorder

o Amphetamine use disorder

o Cannabis use disorder

o Cocaine use disorder

o Inhalant use disorder

o Opioid use disorder

o Other hallucinogen use disorder

o Other (or unknown) substance use disorder

o Polysubstance dependence

o Sedative, hypnotic, or anxiolytic use disorder

o Tobacco use disorder

o Any response containing "intoxication" or "withdrawal" (e.g., moderate alcohol intoxication, opioid intoxication, cannabis withdrawal)

o Any response indicating prescribed drugs causing adverse effects (e.g., benzodiazepines)

Personality disorder

o Antisocial personality disorder

o Borderline personality disorder

o Histrionic personality disorder

o Narcissistic personality disorder

o Paranoid personality disorder

o Schizoid personality disorder

o Schizotypal personality disorder

o Avoidant personality disorder

o Dependent personality disorder

o Obsessive-compulsive personality disorder

o Any response containing "personality" (e.g., accentuation of personality traits/other specific personality/etc)

o Any response containing "antisocial" (adult/child/adolescent)

Trauma and stressor related disorder

o Posttraumatic Stress Disorder

o Acute Stress Disorder

o Adjustment Disorders

o Other (eg. Reactive Attachment Disorder

o Disinhibited Social Engagement Disorder

o Unspecified Trauma- and Stressor-Related Disorder

o Disinhibited Social Engagement Disorder

Anxiety disorder

o Generalized anxiety disorder

o Panic disorder

o Agoraphobia

o Specific phobia

o Social anxiety disorder or social phobia

o Anxiety disorder caused by a general medical condition

o Substance-induced anxiety disorder

o Any response containing "anxiety" (e.g., subclinical / substance induced anxiety)

o Any response containing "obsessive-compulsive behaviour/personality”

Neurodevelopmental disorders

o Intellectual disability

o Autism spectrum disorder

o Attention-deficit/hyperactivity disorder

o Any response containing “developmental”

o Learning disorder

o Fetal Alcohol Syndrome (dysmorphic)

o Intellectual functioning

Neurocognitive disorders

o Delirium

o Minor neurocognitive disorder

o Major neurocognitive disorder

o Major or mild neurocognitive disorder due to Alzheimer's disease

o Any response containing "neurocognitive"

Other

o Obsessive-compulsive disorder (or any response containing "obsessive-compulsive disorder")

o Insomnia disorder

o Gender dysphoria

o Gambling disorder

o Eating disorders

o Catatonia

o Conduct disorder? (OTHER)

o Any response containing "adjustment"(i.e., problems of adjustment/adjustment disorder/etc.)

o Adjustment disorder with anxiety

o Depersonalization

o Any response containing "insomnia" (even if related to another disorder)

o Any response containing “dysphoria”

o Body dysmorphic disorder

o “dysmenorrhoea”

o brain injury/stroke?

In the second stage, we consulted with clinicians on our team to review and refine the categorizations, and to capture any remaining diagnoses that were not categorized in the first stage. This stage also included re-classifying ‘Adjustment Disorder’ on its own, since this appeared to be a catch-all category reflecting any mental health condition that could not be identified among other diagnoses. Additional categorizations were based on the descriptions provided below.

Trauma and stressor related disorder: any diagnoses with “posttraumatic/post-traumatic/post traumatic stress disorder” (e.g., complex posttraumatic stress disorder, likely posttraumatic stress disorder, posttraumatic stress disorder (complex subtype) …etc.), acute stress reaction, affect dysregulation and situational crisis, other reactions to severe stress, personal history of psychological trauma, state of emotional shock and stress

Neurodevelopmental disorder: oppositional defiant disorder, ADD, ADHD, other specified attention-deficit/hyperactivity disorder, unspecified attention-deficit/hyperactivity disorder (past diagnosis)

Anxiety disorder: agoraphobia, panic disorder with/without agoraphobia, panic attack with dpdr, panic attacks

Substance-related disorder: alcohol abuse counselling and surveillance, alcohol involvement, alcohol rehabilitation, alcohol-induced chronic pancreatitis/gastritis/hepatitis, alcoholic fatty liver, amphetamine abuse/dependence, benzodiazepine use disorder, cannabis abuse, cannabis use disorder, cocaine abuse, cocaine use, crack-cocaine use disorder, crystal meth, dextromethorphan use disorder, drug or medicament, drug use, finding of opiate drug in blood, finding of unspecified substance, ghb use disorder, hallucinogen (ketamine) use disorder, hallucinogen persisting perception disorder, ketamine use disorder, lsd use, mental and behavioural disorders due to multiple drug use and use of psychoactive substances, nicotine dependence, opioid abuse, other (or unknown) substance abuse, other (or unknown) substance dependence, other sedatives, personal history of alcohol abuse, personal history of other psychoactive substance abuse, polysubstance abuse, polysubstance use disorder, stimulant use disorder, tobacco use, unspecified caffeine-related disorder, unspecified hallucinogen-related disorder, unspecified tobacco-related disorder

Depressive disorder: alcohol-induced mood disorder, amphetamine-induced mood disorder, dysthymia, dysthymic disorder, mood disorder not otherwise specified, other (or unknown) substance-induced mood disorder, r/o substance induced mdd, unspecified mood [affective] disorder

Bipolar mood disorder: antidepressant induced hypomania, hypomania, mania, substance induced manic episode

Neurocognitive disorders: retrograde amnesia, amnesic disorder, asperger’s, autistic, cognitive disorder, delirium due to a general medical condition, delirium not otherwise specified, dementia not otherwise specified, frontal lobe dementia, functional neurological disorder with memory loss, functional neurological symptom disorder, mental retardation, mild mental retardation, moderate mental retardation, opioid-induced delirium, other (or unknown) substance–induced delirium, other and unspecified symptoms and signs involving cognitive functions and awareness, other specified delirium, possible autism spectrum disorder, substance induced delirium, unspecified delirium, unspecified dementia, huntington’s

Primary psychotic disorder: hallucinations, visual hallucinations, auditory hallucinations, crystal-meth induced psychosis, delusional disorder, with bizarre content, first episode psychosis, hebephrenic schizophrenia, likely substance-induced psychosis, other and unspecified symptoms and signs involving general sensations and perceptions ( illusions ), other schizophrenia, paranoid schizophrenia, prodrome of schizoaffective disorder, provisional: substance-induced psychosis [cocaine], psychosis - most likely substance induced (crystal meth), psychosis nos, schizo, schizoaffective, schizophreni, schizophrenia - treatment refractory, anything with “substance-induced psychosis”, unspecified nonorganic psychosis

Personality disorder: bpd, mixed cluster b traits (narcissistic)

Other: captured any terms that did not fit into the above categories (e.g., genetic disorders, headache, epilepsy, seizures, pain, physical illnesses or conditions, weight/obesity-related, social/environmental stressors, illness anxiety disorder, concussion/post concussive syndrome/unspecified injury of head, down’s syndrome, hoarding disorder, intentional self-harm, intentional self-poisoning, personal history of self-harm, sequelae of intentional self-harm, suicidal ideation, intermittent explosive disorder, provisional tic disorder, unspecified tic disorder, akathisia, dystonia, parkinson's disease, neuroleptic-induced parkinsonism, other medication-induced parkinsonism, other medication-induced movement disorder, persistent (chronic) motor or vocal tic disorder, tardive akathisia, tremor, restlessness and agitation, disruptive/unspecified disruptive, tourette's disorder…etc.)

**Encoding outcome**


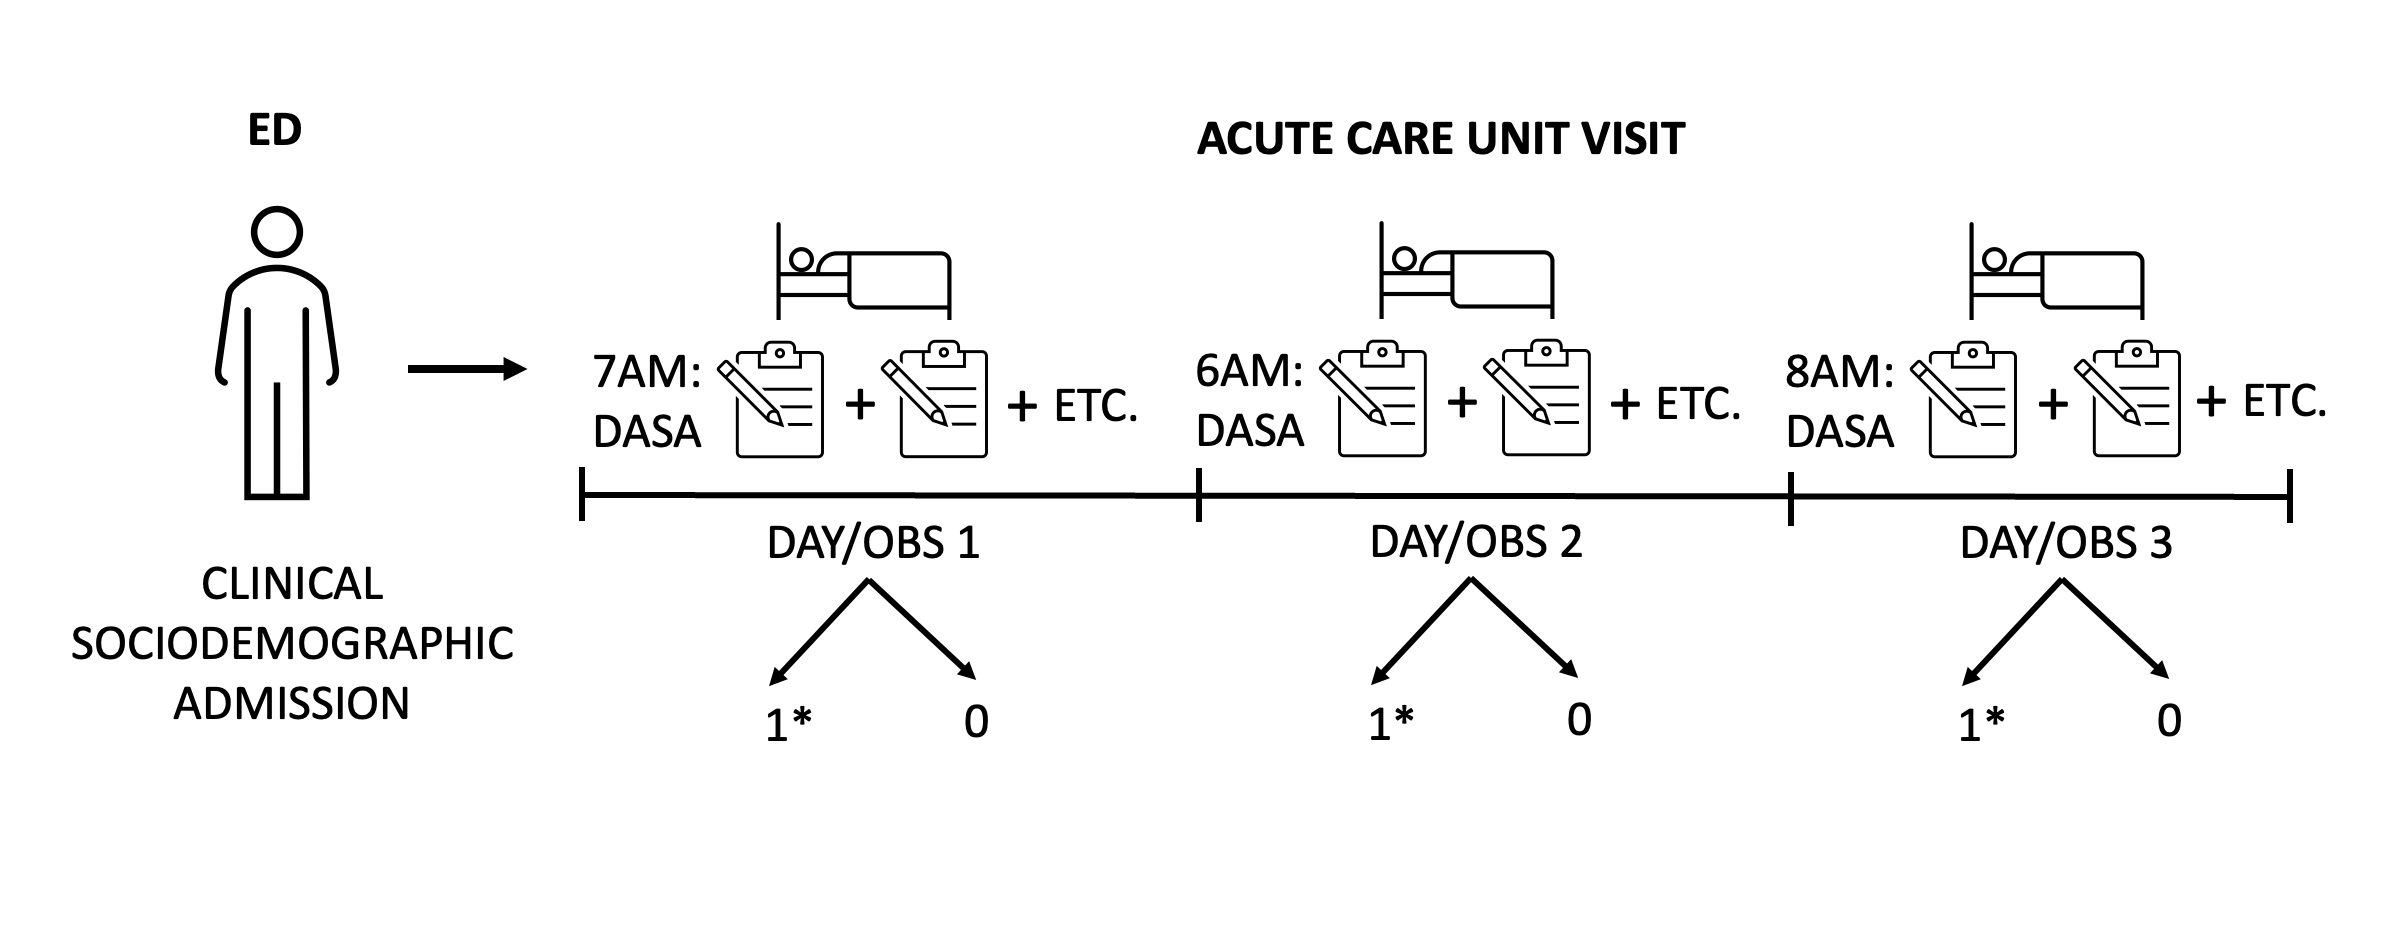


Supplementary figure 1. Illustration of prediction window and timing of measures. *If the outcome (1) occurs on a given day, no further risk assessment data (i.e., narrative notes or DASA scores) will be included in ML modelling for that visit. Figure reproduced from Sikstrom et al[19].

**Model selection and optimization**

To construct an optimized model, 5-fold cross-validation (CV) was used, where the training set was split into 5 equal-sized “folds” (Figure 1). Within a single iteration, a model was trained on 4 of the folds and evaluated on the remaining fold. Each additional iteration would use a different validation fold until all sets were used for validation once, after which F1 scores were averaged across the 5 validation sets. Model selection and optimization involved two steps. First, an initial search to determine an optimal classifier and resampler was conducted by training a model for every possible classifier-resampler combination, drawn from a series of commonly used classifiers (logistic regression, naïve Bayes, random Forest, gradient boosting, support vector machine, decision tree, neural network) and resamplers (no resampling, random undersampling, nearmiss undersampling, SMOTE oversampling). For each model, hyperparameters were loosely tuned using 5-fold CV across 100 iterations of a randomized hyperparameter search. The F1 scores for each model can be found in supplementary table 2. Second, more extensive hyperparameter optimization was conducted on the top three-performing model architectures identified in the previous step. This was done using 5-fold CV across a comprehensive grid search. The architecture and hyperparameters of the top performing model by F1 score were used for the final model.

During the initial model selection phase, the top three performing algorithms using 5-fold CV on the training set were random forest (RF) with no resampling (F1 = 0.200), support vector machine (SVM) with random undersampling (F1 = 0.198), and stochastic gradient boosting (SGB) with SMOTE oversampling (F1 = 0.176) (Supplementary table 4). After additional hyperparameter optimization, the SVM and SGB algorithms had F1-scores of 0.212 ± 0.030 and 0.200 ± 0.027 respectively. All metrics and hyperparameters can be found in supplementary table 5.

**Supplementary results**

Supplementary table 2. Sample characteristics at the level of unique patients

| **Characteristic** | **Overall,**  **n = 17703** | **No incident, n = 169391** | **Incident,**  **n = 7641** | **p-value2** |
| --- | --- | --- | --- | --- |
| **Age** |  |  |  | 0.13 |
| 16-24 | 3531 (20%) | 3363 (20%) | 168 (22%) |  |
| 25-29 | 3040 (17%) | 2899 (17%) | 141 (18%) |  |
| 30-34 | 2681 (15%) | 2562 (15%) | 119 (16%) |  |
| 35-44 | 3534 (20%) | 3376 (20%) | 158 (21%) |  |
| 45-64 | 4208 (24%) | 4057 (24%) | 151 (20%) |  |
| 65+ | 709 (4.0%) | 682 (4.0%) | 27 (3.5%) |  |
| **Gender** |  |  |  | **<0.001** |
| Female | 7065 (40%) | 6834 (40%) | 231 (30%) |  |
| Male | 10233 (58%) | 9717 (57%) | 516 (68%) |  |
| Gender diverse | 197 (1.1%) | 192 (1.1%) | 5 (0.7%) |  |
| Missing | 208 (1.2%) | 196 (1.2%) | 12 (1.6%) |  |
| **Citizenship** |  |  |  | **<0.001** |
| Canadian | 12469 (70%) | 12015 (71%) | 454 (59%) |  |
| Indigenous | 15 (<0.1%) | 15 (<0.1%) | 0 (0%) |  |
| Missing | 4276 (24%) | 4009 (24%) | 267 (35%) |  |
| Not Canadian | 943 (5.3%) | 900 (5.3%) | 43 (5.6%) |  |
| **Housing status** |  |  |  | **<0.001** |
| Living with family | 2612 (15%) | 2517 (15%) | 95 (12%) |  |
| Own | 1734 (9.8%) | 1684 (9.9%) | 50 (6.5%) |  |
| Rent | 5578 (32%) | 5410 (32%) | 168 (22%) |  |
| Supportive housing | 1544 (8.7%) | 1477 (8.7%) | 67 (8.8%) |  |
| Unstable housing/unhoused | 2435 (14%) | 2276 (13%) | 159 (21%) |  |
| Missing | 3800 (21%) | 3575 (21%) | 225 (29%) |  |
| **Marital status** |  |  |  | **<0.001** |
| Partnered | 1350 (7.6%) | 1319 (7.8%) | 31 (4.1%) |  |
| Single | 11104 (63%) | 10669 (63%) | 435 (57%) |  |
| Missing | 5249 (30%) | 4951 (29%) | 298 (39%) |  |
| **Race/Ethnicity** |  |  |  | **<0.001** |
| White | 8595 (49%) | 8283 (49%) | 312 (41%) |  |
| Asian | 1073 (6.1%) | 1042 (6.2%) | 31 (4.1%) |  |
| Black | 2065 (12%) | 1918 (11%) | 147 (19%) |  |
| South Asian | 895 (5.1%) | 862 (5.1%) | 33 (4.3%) |  |
| Indigenous | 480 (2.7%) | 466 (2.8%) | 14 (1.8%) |  |
| Latin American | 495 (2.8%) | 477 (2.8%) | 18 (2.4%) |  |
| Middle Eastern | 554 (3.1%) | 517 (3.1%) | 37 (4.8%) |  |
| Mixed | 475 (2.7%) | 460 (2.7%) | 15 (2.0%) |  |
| Missing | 3071 (17%) | 2914 (17%) | 157 (21%) |  |
| **Admit Mode** |  |  |  | **<0.001** |
| Case Worker / Nurse | 800 (4.5%) | 774 (4.6%) | 26 (3.4%) |  |
| Friend / Family | 4015 (23%) | 3919 (23%) | 96 (13%) |  |
| Mobile Crisis | 56 (0.3%) | 49 (0.3%) | 7 (0.9%) |  |
| Other | 395 (2.2%) | 375 (2.2%) | 20 (2.6%) |  |
| Police | 3600 (20%) | 3303 (19%) | 297 (39%) |  |
| Self | 3714 (21%) | 3652 (22%) | 62 (8.1%) |  |
| Missing | 5123 (29%) | 4867 (29%) | 256 (34%) |  |
| **Primary Diagnosis** |  |  |  | **<0.001** |
| Adjustment disorder | 177 (1.0%) | 174 (1.0%) | 3 (0.4%) |  |
| Anxiety disorder | 476 (2.7%) | 472 (2.8%) | 4 (0.5%) |  |
| Bipolar mood disorder | 2213 (13%) | 2052 (12%) | 161 (21%) |  |
| Depressive disorder | 2108 (12%) | 2096 (12%) | 12 (1.6%) |  |
| Neurocognitive disorders | 175 (1.0%) | 167 (1.0%) | 8 (1.0%) |  |
| Neurodevelopmental disorders | 331 (1.9%) | 316 (1.9%) | 15 (2.0%) |  |
| Other | 416 (2.3%) | 406 (2.4%) | 10 (1.3%) |  |
| Personality disorder | 1252 (7.1%) | 1202 (7.1%) | 50 (6.5%) |  |
| Primary psychotic disorder | 7053 (40%) | 6656 (39%) | 397 (52%) |  |
| Substance-related disorder | 2741 (15%) | 2653 (16%) | 88 (12%) |  |
| Trauma and stressor related disorder | 476 (2.7%) | 467 (2.8%) | 9 (1.2%) |  |
| Missing | 285 (1.6%) | 278 (1.6%) | 7 (0.9%) |  |

1Data presented as n, (% of respective group total); 2Chi-square test of independence

Supplementary table 3. F1 score by model and sampling algorithm.

|  | No resampling | Random undersampling | Nearmiss undersampling | SMOTE oversampling |
| --- | --- | --- | --- | --- |
| Logistic regression | 0.002 | 0.152 | 0.067 | 0.091 |
| Naïve Bayes | 0.091 | 0.099 | 0.046 | 0.078 |
| Random Forest | **0.200** | 0.147 | 0.073 | 0.160 |
| Gradient boosting | 0.022 | 0.144 | 0.070 | **0.176** |
| Support vector machine | 0.077 | **0.198** | 0.112 | 0.091 |
| Decision tree | 0.074 | 0.103 | 0.068 | 0.081 |
| Neural network | 0.066 | 0.113 | 0.060 | 0.070 |

| Model | F1 score1 | ROC-AUC1 | Sensitivity1 | Specificity1 | Optimized hyperparameters |
| --- | --- | --- | --- | --- | --- |
| **Random forest**  **(No resampling)** | 0.21438 (0.03058) | 0.80227 (0.01815) | 0.31989 (0.04847) | 0.94870 (0.00283) | n_estimators = 200  min_samples_split = 20  min_samples_leaf = 4  max_features = log2  max_depth = 20  class_weight = balanced_subsample  bootstrap = True |
| Gradient boosting (SMOTE oversampling) | 0.19982 (0.02711) | 0.79955 (0.02029) | 0.24720 (0.02581) | 0.96184 (0.00362) | smote__sampling_strategy = 0.75  smote__k_neighbors = 3  gbc__subsample = 0.8  gbc__n_estimators = 50  gbc__min_samples_split = 3  gbc__min_samples_leaf = 2  gbc__max_features = log2  gbc__max_depth = 4  gbc__learning_rate = 0.01 |
| Support vector machine (Random undersampling) | 0.21224 (0.03017) | 0.80520 (0.02020) | 0.33333 (0.04599) | 0.94418 (0.00296) | undersampler__sampling_strategy = 0.5  undersampler__replacement = False  svc__kernel = poly  svc_gamma = 0.01  svc__degree = 3  svc__class_weight = balanced  svc__C = 0.1 |

1Data presented as score (standard deviation)

Supplementary figure 2. Group-specific ROC and calibration curves based on race/ethnicity (**A, B**), Citizenship (**C, D**), Admission mode (**E, F**), Gender (**G, H**), and Housing (**I, J**). Triangles denote the point on the ROC curve associated with the prediction threshold of 0.5.

Supplementary table 5. Group-specific FPR, TPR, F1 and ROC-AUC

| **Characteristic** | **FPR1** | **TPR1** | **F11** | **ROC-AUC1** |
| --- | --- | --- | --- | --- |
| **Race/**  **Ethnicity** |  |  |  |  |
| Middle Eastern | 0.0801 (0.0048) | 0.3778 (0.0222) | 0.2372 (0.0158) | 0.7431 (0.0095) |
| Black | 0.0694 (0.0020) | 0.2825 (0.0119) | 0.1906 (0.0070) | 0.7785 (0.0052) |
| Indigenous | 0.0552 (0.0037) | 0.3111 (0.0444) | 0.2051 (0.0233) | 0.8562 (0.0050) |
| Mixed | 0.0525 (0.0021) | 0.3333 (0.1054) | 0.1488 (0.0461) | 0.6980 (0.0133) |
| White | 0.0404 (0.0008) | 0.3066 (0.0089) | 0.2124 (0.0035) | 0.8156 (0.0016) |
| South Asian | 0.0356 (0.0019) | 0.2571 (0.0350) | 0.1799 (0.0233) | 0.8826 (0.0104) |
| Asian | 0.0322 (0.0028) | 0.2381 (0.0000) | 0.2020 (0.0087) | 0.8521 (0.0074) |
| Latin American | 0.0313 (0.0028) | 0.3846 (0.0000) | 0.3405 (0.0117) | 0.7315 (0.0101) |
| **Gender** |  |  |  |  |
| Male | 0.0542 (0.0005) | 0.3210 (0.0113) | 0.2189 (0.0077) | 0.8077 (0.0023) |
| Female | 0.0426 (0.0009) | 0.3433 (0.0146) | 0.2284 (0.0071) | 0.8150 (0.0010) |
| Gender Expansive | 0.0418 (0.0060) | 0.4500 (0.1000) | 0.3182 (0.0767) | 0.9067 (0.0154) |
| **Admission mode** |  |  |  |  |
| Police | 0.0941 (0.0019) | 0.4174 (0.0165) | 0.2405 (0.0072) | 0.7879 (0.0030) |
| Other | 0.0547 (0.0020) | 0.1429 (0.0000) | 0.1213 (0.0023) | 0.7898 (0.0103) |
| Mobile Crisis | 0.0476 (0.0000) | 0.0000 (0.0000) | 0.0000 (0.0000) | 0.6714 (0.0680) |
| Self | 0.0326 (0.0007) | 0.3180 (0.0167) | 0.2419 (0.0120) | 0.8458 (0.0010) |
| Case Worker/Nurse | 0.0303 (0.0007) | 0.2105 (0.0333) | 0.1986 (0.0285) | 0.7655 (0.0112) |
| Friend/Family | 0.0264 (0.0011) | 0.2189 (0.0132) | 0.1919 (0.0106) | 0.7865 (0.0045) |
| **Citizenship** |  |  |  |  |
| Canadian | 0.0427 (0.0004) | 0.3145 (0.0072) | 0.2145 (0.0037) | 0.8179 (0.0012) |
| Not Canadian | 0.0210 (0.0024) | 0.2696 (0.0174) | 0.2794 (0.0160) | 0.8182 (0.0072) |
| **Housing** |  |  |  |  |
| Unstable housing/  Unhoused | 0.0829 (0.0014) | 0.4583 (0.0186) | 0.2298 (0.0069) | 0.8137 (0.0033) |
| Supportive housing | 0.0502 (0.0017) | 0.2308 (0.0243) | 0.1356 (0.0123) | 0.7651 (0.0048) |
| Own | 0.0334 (0.0020) | 0.2903 (0.0000) | 0.2230 (0.0067) | 0.8066 (0.0081) |
| Rent | 0.0318 (0.0007) | 0.2873 (0.0093) | 0.2332 (0.0063) | 0.8276 (0.0017) |
| Living with Family | 0.0273 (0.001) | 0.2491 (0.0141) | 0.2249 (0.0124) | 0.8191 (0.0064) |

1Data presented as score (standard deviation)

Supplementary table 6. Intersectional FPR, TPR, F1 and ROC-AUC with respect to race/ethnicity and gender

| **Race** | **Gender** | **FPR1** | **TPR1** | **F11** | **ROC-AUC1** |
| --- | --- | --- | --- | --- | --- |
| Latin American | All Genders | 0.0313 (0.0028) | 0.3846 (0.0000) | 0.3405 (0.0117) | 0.7315 (0.0101) |
| Female | 0.0000 (0.0000) | 0.0000 (0.0000) | 0.0000 (0.0000) | 0.6203 (0.0670) |
| Male | 0.0404 (0.0036) | 0.4167 (0.0000) | 0.3526 (0.0126) | 0.7345 (0.0087) |
| Asian | All Genders | 0.0322 (0.0028) | 0.2381 (0.0000) | 0.2020 (0.0087) | 0.8521 (0.0074) |
| Female | 0.0243 (0.0031) | 0.3111 (0.0444) | 0.2969 (0.0332) | 0.9098 (0.0099) |
| Male | 0.0374 (0.0037) | 0.1833 (0.0333) | 0.1428 (0.0234) | 0.8094 (0.0100) |
| South Asian | All Genders | 0.0356 (0.0019) | 0.2571 (0.035) | 0.1799 (0.0233) | 0.8826 (0.0104) |
| Female | 0.0359 (0.0028) | 1.0000 (0.0000) | 0.2008 (0.0128) | 0.9758 (0.0022) |
| Male | 0.0362 (0.0020) | 0.2000 (0.0377) | 0.1731 (0.031) | 0.8625 (0.0127) |
| White | All Genders | 0.0404 (0.0008) | 0.3066 (0.0089) | 0.2124 (0.0035) | 0.8156 (0.0016) |
| Female | 0.0352 (0.0017) | 0.3741 (0.0074) | 0.2468 (0.0057) | 0.8358 (0.0028) |
| Male | 0.0444 (0.0007) | 0.2674 (0.0126) | 0.1901 (0.0081) | 0.7953 (0.0013) |
| Mixed | All Genders | 0.0525 (0.0021) | 0.3333 (0.0904) | 0.1488 (0.0461) | 0.6980 (0.0133) |
| Female | 0.0522 (0.0044) | 0.3333 (0.0000) | 0.1475 (0.0083) | 0.5350 (0.0181) |
| Male | 0.0538 (0.0023) | 0.3333 (0.1610) | 0.1473 (0.0905) | 0.8678 (0.0118) |
| Indigenous | All Genders | 0.0552 (0.0037) | 0.3111 (0.0444) | 0.2051 (0.0233) | 0.8562 (0.005) |
| Female | 0.0305 (0.0086) | 0.2500 (0.0000) | 0.2360 (0.0295) | 0.7975 (0.0131) |
| Male | 0.0747 (0.0062) | 0.3600 (0.0800) | 0.1913 (0.0334) | 0.9023 (0.0078) |
| Black | All Genders | 0.0694 (0.0020) | 0.2825 (0.0119) | 0.1906 (0.0070) | 0.7785 (0.0052) |
| Female | 0.0591 (0.0022) | 0.2353 (0.0372) | 0.1510 (0.0194) | 0.7590 (0.0111) |
| Male | 0.0759 (0.0026) | 0.3067 (0.0218) | 0.2100 (0.0141) | 0.7816 (0.0040) |
| Middle Eastern | All Genders | 0.0801 (0.0048) | 0.3778 (0.0222) | 0.2372 (0.0158) | 0.7431 (0.0095) |
| Female | 0.0372 (0.0047) | 0.4000 (0.0000) | 0.3927 (0.0145) | 0.6265 (0.0076) |
| Male | 0.0933 (0.0074) | 0.3692 (0.0308) | 0.2039 (0.0201) | 0.7884 (0.0121) |

1Data presented as score (standard deviation)
